# Supplementary material for: The Extent of Evidence Supporting the Effectiveness of Extended Reality Telerehabilitation on Different Qualitative and Quantitative Outcomes in Stroke Survivors: A Systematic Review
Source: MDPI journal article supplement (doi:10.3390/ijerph20176630), 2023-08-23
Supplement: s1 [file s1]

**Table S1 :Search keywords**

|                                                |                                                                                                                                                                                                                                                                                                                                                                                                                                                                                                                                                                                                                                                                                                                                                                                                                                                                                                                                                    |
|------------------------------------------------|----------------------------------------------------------------------------------------------------------------------------------------------------------------------------------------------------------------------------------------------------------------------------------------------------------------------------------------------------------------------------------------------------------------------------------------------------------------------------------------------------------------------------------------------------------------------------------------------------------------------------------------------------------------------------------------------------------------------------------------------------------------------------------------------------------------------------------------------------------------------------------------------------------------------------------------------------|
| Keywords                                       | Alternatives                                                                                                                                                                                                                                                                                                                                                                                                                                                                                                                                                                                                                                                                                                                                                                                                                                                                                                                                       |
| Population (stroke)                            | “Stroke” OR cerebrovascular accident* OR brain vascular accident* OR “cerebrovascular stroke” OR “cerebral stroke” OR “acute stroke” OR “chronic stroke” OR “hemiplegic “OR “hemiparesis” OR “paresis” OR ‘CVA’ OR ‘CVAs’ OR “transient ischemic attack*” OR “haemorrhagic stroke “ OR “Subarachnoid Haemorrhagic Stroke” OR “subarachnoid stroke” OR “Intracerebral Hemorrhagic Stroke” OR “hemorrhagic stroke” OR “subarachnoid hemorrhagic stroke” OR traumatic brain injur*                                                                                                                                                                                                                                                                                                                                                                                                                                                                    |
| Intervention (virtual reality exercises)       | “virtual reality exercise” OR "Augmented Reality" OR "Virtual Reality" OR “virtual environment” OR “VR” OR “AR” OR “VR-based treadmill training “ OR exergame* OR “wii” OR “Kinect” OR “Immersive VR” OR “Immersion VR” OR “Non-immersive VR” OR “Non-immersion VR” OR “Non-immersive virtual reality” OR “gamification” OR game* OR “wii” OR “mixed – augmented” OR augmented realit* OR mixed realit* OR extended realit* OR "360 video" OR "computer simulation" OR video game* OR “virtual environment” OR “serious game” OR “immersive environment” OR "Xbox Kinect" OR “Nintendo” OR “Active-Video Gaming” OR Virtual Reality Exercise*                                                                                                                                                                                                                                                                                                      |
| Outcomes<br><br>Motor and qualitative outcomes | "motor" OR “mobility" OR “function” OR “equilibrium” OR "balance " OR “posture” OR "gait" OR “gait analysis” OR “walking” OR “speed” OR “stability” OR “posture control” OR “upper limb function*” OR “arm” OR “hand” OR “dexterity” OR lower limb function* OR “trunk” OR “trunk control” OR “core” OR “proprioception” OR “coordination” OR “physical” OR “ADL” OR “daily living activit*” OR “activit* of daily living” OR “motivation” OR “quality of life” OR “QoL” OR “performance” OR “cost effect*” OR “cost”<br><br>Experience* OR “feedback” OR view* OR “opinions” OR “needs” OR facilitator* OR barrier* OR expectation* OR “compliance” OR “non-compliance” OR concern* OR satisfaction* OR dissatisfaction* OR accept* OR “safety” OR “perception” OR perceive* OR “performance” OR “motivation” OR performance* OR “complexity” OR “qualitative research” OR “qualitative method*” OR interview* OR "focus group*" OR “qualitative” |
| Setting<br><br>telerehabilitation              | “Home rehabilitation” OR “home therapy” OR “telerehabilitation” OR<br><br>“Tele-rehabilitation” OR                                                                                                                                                                                                                                                                                                                                                                                                                                                                                                                                                                                                                                                                                                                                                                                                                                                 |

|                     |                                                                                                                                                          |                                                                                                 |
|---------------------|----------------------------------------------------------------------------------------------------------------------------------------------------------|-------------------------------------------------------------------------------------------------|
|                     |                                                                                                                                                          | “Remote Rehabilitation”<br><br>“Virtual Rehabilitation” OR<br><br>“home” OR resident OR “house” |
| Outcomes            | Operational Definition                                                                                                                                   |                                                                                                 |
| Upper limb function | The ability to move the upper limb and do all functional activities in good quality and range of motion including both gross and fine motor skills [67]. |                                                                                                 |
| Lower limb function | The ability to move the lower limb and do all functional activities (sit to stand , standing , walking ) in good quality and range of motion [68].       |                                                                                                 |
| Balance             | The ability to maintain centre of gravity within the base of support during both static and dynamic positions [69].                                      |                                                                                                 |
| Muscle strength     | The amount of force required by a single or a group of muscles to do a certain activity [70].                                                            |                                                                                                 |
| Mobility            | The ability of the person to move and transfer freely to perform different functional tasks [71].                                                        |                                                                                                 |
| Risk of fall        | The probability of a person to fall which may be due to different causes (motor, neurological, cognitive, visual , environmental , psychological) [72].  |                                                                                                 |
| Gait                | The bipedal locomotion function of the lower limb including pattern of coordinated movements of the different body parts [73].                           |                                                                                                 |
| Experiences         | The patients’ perception toward certain types of activities or illness and considered to be a component of health care service[74].                      |                                                                                                 |
| Facilitators        | Factors that encourage the people from doing certain activities[74].                                                                                     |                                                                                                 |
| Barriers            | Factors that hinder the people from doing certain activities[74].                                                                                        |                                                                                                 |

**Table S2: Search strategy**

|          |                                                                                                                                                                                                                                                                                                                                                                                                                                                                                                                                                                                                                                                                                                                                                          |               |
|----------|----------------------------------------------------------------------------------------------------------------------------------------------------------------------------------------------------------------------------------------------------------------------------------------------------------------------------------------------------------------------------------------------------------------------------------------------------------------------------------------------------------------------------------------------------------------------------------------------------------------------------------------------------------------------------------------------------------------------------------------------------------|---------------|
| Database | Strategy                                                                                                                                                                                                                                                                                                                                                                                                                                                                                                                                                                                                                                                                                                                                                 | Number 1/2023 |
| Pubmed   | ((("Stroke" OR cerebrovascular accident* OR brain vascular accident* OR "cerebrovascular stroke" OR "cerebral stroke" OR "acute stroke" OR "chronic stroke" OR "hemiplegic "OR "hemiparesis" OR "paresis" OR ‘CVA’ OR ‘CVAs’ OR "transient ischemic attack*" OR "haemorrhagic stroke " OR "Subarachnoid Haemorrhagic Stroke" OR "subarachnoid stroke" OR "Intracerebral Hemorrhagic Stroke" OR "hemorrhagic stroke" OR "subarachnoid hemorrhagic stroke" OR traumatic brain injur*) AND ("virtual reality exercise" OR "Augmented Reality" OR "Virtual Reality" OR "virtual environment" OR "VR" OR "AR" OR "VR-based treadmill training " OR exergame* OR "wii" OR "Kinect" OR "Immersive VR" OR "Immersion VR" OR "Non-immersive VR" OR "Non-immersion | 295           |

|     |                                                                                                                                                                                                                                                                                                                                                                                                                                                                                                                                                                                                                                                                                                                                                                                                                                                                                                                                                                                                                                                                                                                                                                                                                                                                                                                                                                                                                                                                                                                                                                                                                                                                                                                                                                                                                                                                                                                                                                                                                                                                                                                                                                                                                                                                                                                 |     |
|-----|-----------------------------------------------------------------------------------------------------------------------------------------------------------------------------------------------------------------------------------------------------------------------------------------------------------------------------------------------------------------------------------------------------------------------------------------------------------------------------------------------------------------------------------------------------------------------------------------------------------------------------------------------------------------------------------------------------------------------------------------------------------------------------------------------------------------------------------------------------------------------------------------------------------------------------------------------------------------------------------------------------------------------------------------------------------------------------------------------------------------------------------------------------------------------------------------------------------------------------------------------------------------------------------------------------------------------------------------------------------------------------------------------------------------------------------------------------------------------------------------------------------------------------------------------------------------------------------------------------------------------------------------------------------------------------------------------------------------------------------------------------------------------------------------------------------------------------------------------------------------------------------------------------------------------------------------------------------------------------------------------------------------------------------------------------------------------------------------------------------------------------------------------------------------------------------------------------------------------------------------------------------------------------------------------------------------|-----|
|     | VR" OR "Non-immersive virtual reality" OR "gamification" OR game* OR "wii" OR "mixed – augmented" OR augmented realit* OR mixed realit* OR extended realit* OR "360 video" OR "computer simulation" OR video game* OR "virtual environment" OR "serious game" OR "immersive environment" OR "Xbox Kinect" OR "Nintendo" OR "Active-Video Gaming" OR Virtual Reality Exercise*)) AND ("motor" OR "mobility" OR "function" OR "equilibrium" OR "balance " OR "posture" OR "gait" OR "gait analysis" OR "walking" OR "speed" OR "stability" OR "posture control" OR "upper limb function*" OR "arm" OR "hand" OR "dexterity" OR lower limb function* OR "trunk" OR "trunk control" OR "core" OR "proprioception" OR "coordination" OR "physical" OR "ADL" OR "daily living activit*" OR "activit* of daily living" OR "motivation" OR "quality of life" OR "QoL" OR "performance" OR "cost effect*" OR "cost" Experience* OR "feedback" OR view* OR "opinions" OR "needs" OR facilitator* OR barrier* OR expectation* OR "compliance" OR "non-compliance" OR concern* OR satisfaction* OR dissatisfaction* OR accept* OR "safety" OR "perception" OR perceive* OR "performance" OR "motivation" OR performance* OR "complexity" OR "qualitative research" OR "qualitative method*" OR interview* OR "focus group*" OR "qualitative")) AND ("Home rehabilitation" OR "home therapy" OR "telerehabilitation" OR "Tele-rehabilitation" OR "Remote Rehabilitation" "Virtual Rehabilitation" OR "home" OR resident OR "house")                                                                                                                                                                                                                                                                                                                                                                                                                                                                                                                                                                                                                                                                                                                                                                                          |     |
| WoS | ((((TS=(“Stroke” OR cerebrovascular acciden* OR brain vascular acciden* OR “cerebrovascular stroke” OR “cerebral stroke” OR “acute stroke” OR “chronic stroke” OR “hemiplegic “OR “hemiparesis” OR “paresis” OR “CVA” OR “CVAs” OR “transient ischemic attack” OR “haemorrhagic stroke “ OR “Subarachnoid Haemorrhagic Stroke” OR “subarachnoid stroke” OR “Intracerebral Hemorrhagic Stroke” OR “hemorrhagic stroke” OR “subarachnoid hemorrhagic stroke” OR traumatic brain injur*)) AND TS=(“virtual reality exercise” OR "Augmented Reality" OR "Virtual Reality" OR “virtual environment” OR “VR” OR “AR” OR “VR-based treadmill training “ OR exergame* OR “wii” OR “Kinect” OR “Immersive VR” OR “Immersion VR” OR “Non-immersive VR” OR “Non-immersion VR” OR “Non-immersive virtual reality” OR “gamification” OR game* OR “wii” OR “mixed – augmented” OR virtual realit* OR augmented realit* OR mixed realit* OR extended realit* OR "360 video" OR "computer simulation" OR video game* OR “virtual environment” OR “serious game” OR “immersive environment” OR "Xbox Kinect" OR “Nintendo” OR “Active-Video Gaming” OR Virtual Reality Exercis* )) AND TS=("motor" OR “mobility" OR “function” OR “equilibrium” OR "balance " OR “posture” OR "gait" OR “gait analysis” OR “walking” OR “speed” OR “stability” OR “posture control” OR upper limb functio* OR “arm” OR “hand” OR “dexterity” OR lower limb functio* OR “trunk” OR “trunk control” OR “core” OR “proprioception” OR “coordination” OR “physical” OR “ADL” OR daily living activit* OR activit* of daily living OR “motivation” OR “quality of life” OR “QoL” OR “performance” OR cost effect* OR “cost” Experience* OR “feedback” OR view* OR “opinions”OR “needs” OR facilitato* OR barrie* OR expectatio* OR “compliance” OR “non-compliance” OR concern* OR satisfaction* OR dissatisfaction* OR accept* OR concern* OR “safety” OR “perception” OR perceive* OR “performance” OR “motivation” OR performance* OR “complexity” OR “qualitative research” OR “qualitative method*” OR interview* OR "focus group*" OR “qualitative” )) AND TS=(“Home rehabilitation” OR “home therapy” OR “telerehabilitation” OR “Tele-rehabilitation” OR “Remote Rehabilitation” “Virtual Rehabilitation” OR “home” OR “resident” OR “house”) | 967 |

|         |                                                                                                                                                                                                                                                                                                                                                                                                                                                                                                                                                                                                                                                                                                                                                                                                                                                                                                                                                                                                                                                                                                                                                                                                                                                                                                                                                                                                                                                                                                                                                                                                                                                                                                                                                                                                                                                                                                                                                                                                                                                                                                                                                                                                                                                                                                                                                                                                                                       |     |
|---------|---------------------------------------------------------------------------------------------------------------------------------------------------------------------------------------------------------------------------------------------------------------------------------------------------------------------------------------------------------------------------------------------------------------------------------------------------------------------------------------------------------------------------------------------------------------------------------------------------------------------------------------------------------------------------------------------------------------------------------------------------------------------------------------------------------------------------------------------------------------------------------------------------------------------------------------------------------------------------------------------------------------------------------------------------------------------------------------------------------------------------------------------------------------------------------------------------------------------------------------------------------------------------------------------------------------------------------------------------------------------------------------------------------------------------------------------------------------------------------------------------------------------------------------------------------------------------------------------------------------------------------------------------------------------------------------------------------------------------------------------------------------------------------------------------------------------------------------------------------------------------------------------------------------------------------------------------------------------------------------------------------------------------------------------------------------------------------------------------------------------------------------------------------------------------------------------------------------------------------------------------------------------------------------------------------------------------------------------------------------------------------------------------------------------------------------|-----|
|         |                                                                                                                                                                                                                                                                                                                                                                                                                                                                                                                                                                                                                                                                                                                                                                                                                                                                                                                                                                                                                                                                                                                                                                                                                                                                                                                                                                                                                                                                                                                                                                                                                                                                                                                                                                                                                                                                                                                                                                                                                                                                                                                                                                                                                                                                                                                                                                                                                                       |     |
| CINAHL  | <p>( “Stroke” OR cerebrovascular accident* OR brain vascular accident* OR “cerebrovascular stroke” OR “cerebral stroke” OR “acute stroke” OR “chronic stroke” OR “hemiplegic “OR “hemiparesis” OR “paresis” OR “CVA” OR “CVAs” OR “transient ischemic attack*” OR “haemorrhagic stroke “ OR “Subarachnoid Haemorrhagic Stroke” OR “subarachnoid stroke” OR “Intracerebral Hemorrhagic Stroke” OR “hemorrhagic stroke” OR “subarachnoid hemorrhagic stroke” OR traumatic brain injur* ) AND ( “virtual reality exercise” OR "Augmented Reality" OR "Virtual Reality" OR “virtual environment” OR “VR” OR “AR” OR “VR-based treadmill training “ OR exergame* OR “wii” OR “Kinect” OR “Immersive VR” OR “Immersion VR” OR “Non-immersive VR” OR “Non-immersion VR” OR “Non-immersive virtual reality” OR “gamification” OR game* OR “wii” OR “mixed – augmented” OR augmented realit* OR mixed realit* OR extended realit* OR "360 video" OR "computer simulation" OR video game* OR “virtual environment” OR “serious game” OR “immersive environment” OR "Xbox Kinect" OR “Nintendo” OR “Active-Video Gaming” OR Virtual Reality Exercise* ) AND ( "motor" OR “mobility" OR “function” OR “equilibrium” OR "balance " OR “posture” OR "gait" OR “gait analysis” OR “walking” OR “speed” OR “stability” OR “posture control” OR “upper limb function*” OR “arm” OR “hand” OR “dexterity” OR lower limb function* OR “trunk” OR “trunk control” OR “core” OR “proprioception” OR “coordination” OR “physical” OR “ADL” OR “daily living activit*” OR “activit* of daily living” OR “motivation” OR “quality of life” OR “QoL” OR “performance” OR “cost effect*” OR “cost” Experience* OR “feedback” OR view* OR “opinions” OR “needs” OR facilitator* OR barrier* OR expectation* OR “compliance” OR “non-compliance” OR concern* OR satisfaction* OR dissatisfaction* OR accept* OR “safety” OR “perception” OR perceive* OR “performance” OR “motivation” OR performance* OR “complexity” OR “qualitative research” OR “qualitative method*” OR interview* OR "focus group*" OR “qualitative” ) AND ( “Home rehabilitation” OR “home therapy” OR “telerehabilitation” OR “Tele-rehabilitation” OR “Remote Rehabilitation” “Virtual Rehabilitation” OR “home” OR resident OR “house” )</p> <p><b>Limiters - Language:</b> English</p> <p><b>Expanders</b> - Apply equivalent subjects</p> <p><b>Search modes</b> - Boolean/Phrase</p> | 174 |
| Medline | <p>Ovid MEDLINE(R) ALL &lt;1946 to January 06, 2023&gt;</p> <p>1        stroke.mp. [mp=title, book title, abstract, original title, name of substance word, subject heading word, floating sub-heading word, keyword heading word, organism supplementary concept word, protocol supplementary concept word, rare disease supplementary concept word, unique identifier, synonyms]        357938</p> <p>2        cerebrovascular accident.mp. [mp=title, book title, abstract, original title, name of substance word, subject heading word, floating sub-heading word, keyword heading word, organism supplementary concept word, protocol supplementary concept word, rare disease supplementary concept word, unique identifier, synonyms] 5327</p>                                                                                                                                                                                                                                                                                                                                                                                                                                                                                                                                                                                                                                                                                                                                                                                                                                                                                                                                                                                                                                                                                                                                                                                                                                                                                                                                                                                                                                                                                                                                                                                                                                                                                | 369 |

|  |    |                                                                                                                                                                                                                                                                                                                               |        |  |
|--|----|-------------------------------------------------------------------------------------------------------------------------------------------------------------------------------------------------------------------------------------------------------------------------------------------------------------------------------|--------|--|
|  | 3  | Stroke/ or Hemiplegia/                                                                                                                                                                                                                                                                                                        | 137643 |  |
|  | 4  | Exergaming/                                                                                                                                                                                                                                                                                                                   | 92     |  |
|  | 5  | Virtual Reality/ or Stroke Rehabilitation/                                                                                                                                                                                                                                                                                    | 21703  |  |
|  | 6  | virtual reality exercises.mp. [mp=title, book title, abstract, original title, name of substance word, subject heading word, floating sub-heading word, keyword heading word, organism supplementary concept word, protocol supplementary concept word, rare disease supplementary concept word, unique identifier, synonyms] | 31     |  |
|  | 7  | Augmented Reality/                                                                                                                                                                                                                                                                                                            | 1020   |  |
|  | 8  | augmented reality.mp. [mp=title, book title, abstract, original title, name of substance word, subject heading word, floating sub-heading word, keyword heading word, organism supplementary concept word, protocol supplementary concept word, rare disease supplementary concept word, unique identifier, synonyms]         | 4018   |  |
|  | 9  | immersive virtual reality.mp.                                                                                                                                                                                                                                                                                                 | 1064   |  |
|  | 10 | non-immersive virtual reality.mp.                                                                                                                                                                                                                                                                                             | 72     |  |
|  | 11 | 1 or 2 or 3                                                                                                                                                                                                                                                                                                                   | 370289 |  |
|  | 12 | 4 or 5 or 6 or 7 or 8 or 9 or 10                                                                                                                                                                                                                                                                                              | 26011  |  |
|  | 13 | Motor Activity/ or motor outcomes.mp.                                                                                                                                                                                                                                                                                         | 100740 |  |
|  | 14 | "Activities of Daily Living"/ or mobility function.mp.                                                                                                                                                                                                                                                                        | 72080  |  |
|  | 15 | balance.mp. or Postural Balance/                                                                                                                                                                                                                                                                                              | 302226 |  |
|  | 16 | Gait/ or Gait Analysis/ or gait.mp.                                                                                                                                                                                                                                                                                           | 73717  |  |
|  | 17 | Upper Extremity/ or upper limb function.mp.                                                                                                                                                                                                                                                                                   | 15471  |  |
|  | 18 | walking.mp. or Walking Speed/ or Walking/                                                                                                                                                                                                                                                                                     | 99997  |  |
|  | 19 | Hand Strength/ or Motor Skills/ or hand dexterity.mp.                                                                                                                                                                                                                                                                         | 45003  |  |
|  | 20 | trunk control.mp.                                                                                                                                                                                                                                                                                                             | 673    |  |
|  | 21 | proprioception.mp. or Proprioception/                                                                                                                                                                                                                                                                                         | 12141  |  |

|        |                                                                                                                                                                                                                                                                                                                                                                                                                                                                                                                                                                                                                                                                                                                                                                                                                                                                                                        |     |
|--------|--------------------------------------------------------------------------------------------------------------------------------------------------------------------------------------------------------------------------------------------------------------------------------------------------------------------------------------------------------------------------------------------------------------------------------------------------------------------------------------------------------------------------------------------------------------------------------------------------------------------------------------------------------------------------------------------------------------------------------------------------------------------------------------------------------------------------------------------------------------------------------------------------------|-----|
|        | <div>22 Accidental Falls/ or risk of fall.mp. 28179</div> <div>23 quality of life.mp. or "Quality of Life"/ 431548</div> <div>24 Qualitative Research/ 78604</div> <div>25 Patient Satisfaction/ or patients views.mp. 89985</div> <div>26 experiences.mp. 258545</div> <div>27 facilitators.mp. 23823</div> <div>28 expectations.mp. or Motivation/152307</div> <div>29 barriers.mp. 187125</div> <div>30 compliance.mp. or Patient Compliance/ 185866</div> <div>31 cost effectiveness.mp. or Cost-Benefit Analysis/ 126370</div> <div>32 13 or 14 or 15 or 16 or 17 or 18 or 19 or 20 or 21 or 22 or 23 or 24 or 25 or 26 or 27 or 28 or 29 or 30 or 31 1941267</div> <div>33 telerehabilitation.mp. or Telerehabilitation/ or Rehabilitation/ or Remote Consultation/ 26158</div> <div>34 home rehabilitation.mp. 524</div> <div>35 33 or 34 26594</div> <div>36 11 and 12 and 32 and 35 369</div> |     |
| Embase | <div>Embase &lt;1974 to 2023 January 06&gt;</div> <div>1 stroke.mp. [mp=title, abstract, heading word, drug trade name, original title, device manufacturer, drug manufacturer, device trade name, keyword heading word, floating subheading word, candidate term word] 536823</div> <div>2 cerebrovascular accident.mp. [mp=title, abstract, heading word, drug trade name, original title, device manufacturer, drug manufacturer, device trade name, keyword heading word, floating subheading word, candidate term word] 270659</div>                                                                                                                                                                                                                                                                                                                                                              | 858 |

|  |    |                                                                                                                                                                                                                                   |        |  |
|--|----|-----------------------------------------------------------------------------------------------------------------------------------------------------------------------------------------------------------------------------------|--------|--|
|  | 3  | Stroke/ or Hemiplegia/                                                                                                                                                                                                            | 198051 |  |
|  | 4  | Exergaming/                                                                                                                                                                                                                       | 194    |  |
|  | 5  | Virtual Reality/ or Stroke Rehabilitation/                                                                                                                                                                                        | 30547  |  |
|  | 6  | virtual reality exercises.mp. [mp=title, abstract, heading word, drug trade name, original title, device manufacturer, drug manufacturer, device trade name, keyword heading word, floating subheading word, candidate term word] | 44     |  |
|  | 7  | Augmented Reality/                                                                                                                                                                                                                | 1772   |  |
|  | 8  | augmented reality.mp. [mp=title, abstract, heading word, drug trade name, original title, device manufacturer, drug manufacturer, device trade name, keyword heading word, floating subheading word, candidate term word]         | 4768   |  |
|  | 9  | immersive virtual reality.mp.                                                                                                                                                                                                     | 1192   |  |
|  | 10 | non-immersive virtual reality.mp.                                                                                                                                                                                                 | 88     |  |
|  | 11 | 1 or 2 or 3                                                                                                                                                                                                                       | 622687 |  |
|  | 12 | 4 or 5 or 6 or 7 or 8 or 9 or 10                                                                                                                                                                                                  | 34580  |  |
|  | 13 | Motor Activity/ or motor outcomes.mp.                                                                                                                                                                                             | 48271  |  |
|  | 14 | "Activities of Daily Living"/ or mobility function.mp.                                                                                                                                                                            | 88101  |  |
|  | 15 | balance.mp. or Postural Balance/                                                                                                                                                                                                  | 391093 |  |
|  | 16 | Gait/ or Gait Analysis/ or gait.mp.                                                                                                                                                                                               | 119268 |  |
|  | 17 | Upper Extremity/ or upper limb function.mp.                                                                                                                                                                                       | 23680  |  |
|  | 18 | walking.mp. or Walking Speed/ or Walking/                                                                                                                                                                                         | 164935 |  |
|  | 19 | Hand Strength/ or Motor Skills/ or hand dexterity.mp.                                                                                                                                                                             | 88393  |  |
|  | 20 | trunk control.mp.                                                                                                                                                                                                                 | 970    |  |
|  | 21 | proprioception.mp. or Proprioception/                                                                                                                                                                                             | 17798  |  |

|                   |                                                                                                                                                                                                                                                                                                                                                                                                                                                                                                                                                                                                                                                                                                                                                                                  |    |
|-------------------|----------------------------------------------------------------------------------------------------------------------------------------------------------------------------------------------------------------------------------------------------------------------------------------------------------------------------------------------------------------------------------------------------------------------------------------------------------------------------------------------------------------------------------------------------------------------------------------------------------------------------------------------------------------------------------------------------------------------------------------------------------------------------------|----|
|                   | 22 Accidental Falls/ or risk of fall.mp. 44250<br>23 quality of life.mp. or "Quality of Life"/ 751457<br>24 Qualitative Research/ 108748<br>25 Patient Satisfaction/ or patients views.mp. 164604<br>26 experiences.mp. 304397<br>27 facilitators.mp. 30117<br>28 expectations.mp. or Motivation/213956<br>29 barriers.mp. 229375<br>30 compliance.mp. or Patient Compliance/ 386445<br>31 cost effectiveness.mp. or Cost-Benefit Analysis/ 277085<br>32 13 or 14 or 15 or 16 or 17 or 18 or 19 or 20 or 21 or 22 or 23 or 24 or 25 or 26 or 27 or 28 or 29 or 30 or 31 2897880<br>33 telerehabilitation.mp. or Telerehabilitation/ or Rehabilitation/ or Remote Consultation/ 108458<br>34 home rehabilitation.mp. 1445<br>35 33 or 34 109575<br>36 11 and 12 and 32 and 35 858 |    |
| PEDro             | Stroke AND telerehabilitation<br><br><b>Excluding</b> systematic reviews.                                                                                                                                                                                                                                                                                                                                                                                                                                                                                                                                                                                                                                                                                                        | 20 |
| Registered trials | “Stroke” OR cerebrovascular acciden* OR brain vascular acciden* OR “cerebrovascular stroke” OR “cerebral stroke” OR “acute stroke” OR “chronic stroke” OR “hemiplegic “OR “hemiparesis” OR “paresis” OR “CVA” OR “CVAs” OR “transient ischemic attac   stroke   “virtual reality exercise” OR "Augmented Reality" OR "Virtual Reality" OR “virtual environment” OR “VR” OR “AR” OR “VR-based treadmill training “ OR exergame* OR “wii” OR “Kinect” OR “Immersive VR” OR “Immersion VR” OR “Non-immersive VR” OR “Non-imme   “upper limb function” OR “lower limb                                                                                                                                                                                                                | 5  |



|                                        |                                                                                                                                                                                                                                                                                                                                                                                                                                                                                                                                                                                                                                                                                                                                                                                                                                                                                                                                                                                                                                                                                                                                                                                                                                                                                                                                                                                                                                                                                                                                                                                                                                                                                                                                                                                                                                                                                                                                                                                                                                                                                                                                                                                                                                                                                                                                                                     |    |
|----------------------------------------|---------------------------------------------------------------------------------------------------------------------------------------------------------------------------------------------------------------------------------------------------------------------------------------------------------------------------------------------------------------------------------------------------------------------------------------------------------------------------------------------------------------------------------------------------------------------------------------------------------------------------------------------------------------------------------------------------------------------------------------------------------------------------------------------------------------------------------------------------------------------------------------------------------------------------------------------------------------------------------------------------------------------------------------------------------------------------------------------------------------------------------------------------------------------------------------------------------------------------------------------------------------------------------------------------------------------------------------------------------------------------------------------------------------------------------------------------------------------------------------------------------------------------------------------------------------------------------------------------------------------------------------------------------------------------------------------------------------------------------------------------------------------------------------------------------------------------------------------------------------------------------------------------------------------------------------------------------------------------------------------------------------------------------------------------------------------------------------------------------------------------------------------------------------------------------------------------------------------------------------------------------------------------------------------------------------------------------------------------------------------|----|
|                                        | <p>function” OR “balance” OR “ADL” OR “mobility” OR “truck control” OR “gait” OR “falls” OR “quality of life” OR “experiences” OR “needs” OR “expectations” OR “facilitators” OR “barriers” OR “qualitative studie*   Adult, Older Adult</p> <p><b>Applied Filters:</b> Adult (18–64) Older Adult (65+) , has results.</p>                                                                                                                                                                                                                                                                                                                                                                                                                                                                                                                                                                                                                                                                                                                                                                                                                                                                                                                                                                                                                                                                                                                                                                                                                                                                                                                                                                                                                                                                                                                                                                                                                                                                                                                                                                                                                                                                                                                                                                                                                                          |    |
| ProQuest Dissertations & Theses Global | <p>summary("Stroke" OR cerebrovascular acciden* OR brain vascular acciden* OR "cerebrovascular stroke" OR "cerebral stroke" OR "acute stroke" OR "chronic stroke" OR "hemiplegic " OR "hemiparesis" OR "paresis" OR “CVA” OR “CVAs” OR "transient ischemic attack" OR "haemorrhagic stroke " OR "Subarachnoid Haemorrhagic Stroke" OR "subarachnoid stroke" OR "Intracerebral Hemorrhagic Stroke" OR "hemorrhagic stroke" OR "subarachnoid hemorrhagic stroke" OR traumatic brain injur*) AND summary("virtual reality exercise" OR "Augmented Reality" OR "Virtual Reality" OR "virtual environment" OR "VR" OR "AR" OR "VR-based treadmill training " OR exergame* OR "wii" OR "Kinect" OR "Immersive VR" OR "Immersion VR" OR "Non-immersive VR" OR "Non-immersion VR" OR "Non-immersive virtual reality" OR "gamification" OR game* OR "wii" OR "mixed augmented" OR virtual realit* OR augmented realit* OR mixed realit* OR extended realit* OR "360 video" OR "computer simulation" OR video game* OR "virtual environment" OR "serious game" OR "immersive environment" OR "Xbox Kinect" OR "Nintendo" OR "Active-Video Gaming" OR Virtual Reality Exercis*) AND summary("motor" OR "mobility" OR "function" OR "equilibrium" OR "balance " OR "posture" OR "gait" OR "gait analysis" OR "walking" OR "speed" OR "stability" OR "posture control" OR "upper limb functio*" OR "arm" OR "hand" OR "dexterity" OR lower limb functio* OR "trunk" OR "trunk control" OR "core" OR "proprioception" OR "coordination" OR "physical" OR "ADL" OR "daily living activit*" OR "activit* of daily living" OR "motivation" OR "quality of life" OR "QoL" OR "performance" OR "cost effect*" OR "cost" Experience* OR "feedback" OR view* OR "opinions" OR "needs" OR facilitato* OR barrie* OR expectatio* OR "compliance" OR "non-compliance" OR concern* OR satisfaction* OR dissatisfaction* OR accept* OR "safety" OR "perception" OR perceive* OR "performance" OR "motivation" OR performance* OR "complexity" OR "qualitative research" OR "qualitative method*" OR interview* OR "focus group*" OR "qualitative") AND summary("Home rehabilitation" OR "home therapy" OR "telerehabilitation" OR "Tele-rehabilitation" OR "Remote Rehabilitation" "Virtual Rehabilitation" OR "home" OR "resident" OR "house")</p> <p><b>limited by English language</b></p> | 49 |

Table S3: Summary of effect sizes .

|                   |  |             |                                | Outcome measures    |       |     |                                              |                    |       |                           |                     |                     |                 |            |          |      |         |      |        |       |       |
|-------------------|--|-------------|--------------------------------|---------------------|-------|-----|----------------------------------------------|--------------------|-------|---------------------------|---------------------|---------------------|-----------------|------------|----------|------|---------|------|--------|-------|-------|
| Study             |  | Sample size |                                | Upper limb function |       |     |                                              |                    |       |                           |                     | Lower limb function | Muscle strength |            | Mobility |      | Balance |      | Gait   |       | Fall  |
|                   |  |             | FOLLOW UP                      | FMA-UE              | ARAT  | BBT | Stroke Impact Scale hand motor domain scores | Nine Hole Peg Test | CAHAI | MAL (quality of movement) | MAL (amount of use) | FMA-LE              | MRC proximal    | MRC distal | TUG:     | POMA | POMA-B  | BBS  | POMA-G | FAC   | FES-I |
| Cramer ., 2019    |  | 124         | baseline to 30 days            | -1.1                |       |     | X                                            |                    |       |                           |                     |                     |                 |            |          |      |         |      |        |       |       |
| Yang ., 2022      |  | 84          | baseline-post                  | -0.49               |       |     |                                              |                    |       |                           |                     | 0.05                |                 |            |          |      |         | 0.16 |        | 0.24* |       |
| Adie ., 2017      |  | 235         | baseline-post (6 weeks)        |                     | -0.75 |     |                                              |                    |       |                           |                     |                     |                 |            |          |      |         |      |        |       |       |
|                   |  |             | baseline-post (6 months)       |                     | -0.68 |     |                                              |                    |       |                           |                     |                     |                 |            |          |      |         |      |        |       |       |
| Ballester ., 2017 |  | 35          | baseline-post (week 3)         | -0.30               |       |     |                                              |                    | 0.48* |                           |                     |                     | -0.17           | -0.12      |          |      |         |      |        |       |       |
|                   |  |             | baseline-post (week 12)        | 0.34*               |       |     |                                              |                    | -0.08 |                           |                     |                     | -0.62           | -0.17      |          |      |         |      |        |       |       |
| Lee ., 2022       |  | 68          | baseline - post (4 weeks)      |                     |       |     |                                              |                    |       |                           |                     |                     |                 |            | X        | X    |         | X    |        |       | X     |
|                   |  |             | baseline - follow up (4 weeks) |                     |       |     |                                              |                    |       |                           |                     |                     |                 |            | X        | X    |         | X    |        |       | X     |
| Piron ., 2009     |  | 36          | T30-T60                        | 0.30*               |       |     |                                              |                    |       |                           |                     |                     |                 |            |          |      |         |      |        |       |       |

|                      |                                                                                                                                                                                                                                                                                                                        |    |                                           |       |       |       |  |       |  |           |         |  |  |  |  |  |         |        |         |  |  |
|----------------------|------------------------------------------------------------------------------------------------------------------------------------------------------------------------------------------------------------------------------------------------------------------------------------------------------------------------|----|-------------------------------------------|-------|-------|-------|--|-------|--|-----------|---------|--|--|--|--|--|---------|--------|---------|--|--|
|                      |                                                                                                                                                                                                                                                                                                                        |    | T60-T90                                   | 0.32* |       |       |  |       |  |           |         |  |  |  |  |  |         |        |         |  |  |
| Llore´ns .,<br>2015  |                                                                                                                                                                                                                                                                                                                        | 30 | base line to<br>week 8                    |       |       |       |  |       |  |           |         |  |  |  |  |  | 0.54**  | 0.66** | 0.89*** |  |  |
|                      |                                                                                                                                                                                                                                                                                                                        |    | week 8 to<br>week 12                      |       |       |       |  |       |  |           |         |  |  |  |  |  | 0.92*** | -0.75  | -0.15   |  |  |
| Zondervan .,<br>2016 |                                                                                                                                                                                                                                                                                                                        | 17 | baseline-1<br><br>month post<br>treatment |       | 0.25* | -0.35 |  | 0.23* |  | 1.37***** | 0.90*** |  |  |  |  |  |         |        |         |  |  |
| Hernandez .,<br>2022 |                                                                                                                                                                                                                                                                                                                        | 51 | NO DATA<br><br>AVAILABLE                  | X     |       |       |  |       |  |           |         |  |  |  |  |  |         |        |         |  |  |
|                      | All numbers represent Cohen's d.(Effect size)<br><br>Classification of effect sizes: trivial (Cohen's d ≤ .2); * small (Cohen's d > .2); ** moderate (Cohen's d > .5); *** large (Cohen's d > .8); ***** very large (Cohen's d > 1.3).<br><br>(X) means impossible to calculate effect size based on reported results. |    |                                           |       |       |       |  |       |  |           |         |  |  |  |  |  |         |        |         |  |  |

Table S4: Virtual reality exercises used in the experimental groups.

| Study             | VR exercise                                                                                                                                                              | Mode of delivery  |
|-------------------|--------------------------------------------------------------------------------------------------------------------------------------------------------------------------|-------------------|
| cramer.,2019      | Arm exercises (88 exercises) using standard exercise equipment (resistance tubing or putty) including (stretching, strengthening, and active ROM).(SVR)                  | Non-immersive VR  |
| Yang.,2022        | Exercises in form of the upper limb (22 exercises) and lower limb (7 exercises) motor functions, balance ability (11 exercises), or/and coordination (6 exercises).(SVR) | AR                |
| Adie., 2017       | Wii sports games (bowling, tennis, golf, and baseball) (NSVR)                                                                                                            | Non-immersive VR  |
| Ballester ., 2017 | goal-directed grasp action execution and motor imagery.(SVR)                                                                                                             | Semi-immersive VR |

|                        |                                                                                                   |                   |
|------------------------|---------------------------------------------------------------------------------------------------|-------------------|
| Lee ., 2022            | endurance, speed, and range of motion of the upper extremities, trunk, hips, and whole body.(SVR) | AR                |
| Piron ., 2009          | 5 virtual motor tasks. (SVR)                                                                      | Non-immersive VR  |
| Llore´ns ., 2015 [15]  | Balance exercises in empty scenario environment.(SVR)                                             | Non-immersive VR  |
| Zondervan ., 2016 [16] | MusicGlove therapy.(SVR)                                                                          | Semi-immersive VR |
| Hernandez ., 2022 [17] | Jintronix system (NSVR)                                                                           | Non-immersive VR  |

Table S5: Summary of the quantitative studies.

| Study author<br>& year<br>(country) | design | Participants’<br>number (age)                     | Time from a stroke in<br>days(stage)                                                                                                          | Stroke subtype<br>in %                                                                                                   | Cognitive state                                                                                                                                                                               | Intervention                                                                                                                                                   | Setting of<br>treatment                                                                                                      | Revision of<br>treatment plan | Dose of<br>exercises                                                                                                                                                                            | multimorbid<br>conditions<br>(event/total)                                                                                                                                                                                                  | Target<br>region | Devices used to<br>deliver VR<br>exercises                                                                                                                                    | Primary<br>Outcomes<br>(Outcome<br>measure scale) | Adverse effects                                                                                                                                                                                                                            |
|-------------------------------------|--------|---------------------------------------------------|-----------------------------------------------------------------------------------------------------------------------------------------------|--------------------------------------------------------------------------------------------------------------------------|-----------------------------------------------------------------------------------------------------------------------------------------------------------------------------------------------|----------------------------------------------------------------------------------------------------------------------------------------------------------------|------------------------------------------------------------------------------------------------------------------------------|-------------------------------|-------------------------------------------------------------------------------------------------------------------------------------------------------------------------------------------------|---------------------------------------------------------------------------------------------------------------------------------------------------------------------------------------------------------------------------------------------|------------------|-------------------------------------------------------------------------------------------------------------------------------------------------------------------------------|---------------------------------------------------|--------------------------------------------------------------------------------------------------------------------------------------------------------------------------------------------------------------------------------------------|
| Cramer .,2019<br><br>(USA)          | RCT    | Total:124<br><br>E:62 (62±14)<br><br>C:62 (60±13) | E: 132 ±65<br><br>C: 129±59<br><br>Patients enrolled <90 d<br>after stroke<br><br>E: 16 ±25.8.<br><br>C: 22 ±35.5<br><br>(Subacute – chronic) | E: ischemic<br><br>87.1%<br><br>Hemorrhagic<br><br>12.9%<br><br>C: ischemic<br><br>83.9%<br><br>hemorrhagic<br><br>16.1% | Excluded in there<br>was a Significant<br>cognitive<br>impairment,<br>defined as<br>Montreal<br>Cognitive<br>Assessment score<br>< 22 (a lower<br>score<br>was permitted if<br>due to aphasia | EG: VR exercises<br><br>CG: arm exercises<br><br>(demonstrated by the<br>therapists on supervised<br>days or via printed<br>homework on unsupervised<br>days). | EG: at home.<br><br>CG: 18<br>supervised<br>sessions at<br>research centre<br>and 18<br>unsupervised<br>sessions at<br>home. | every 2 weeks                 | EG:<br><br>(6-8 weeks)<br><br>(36 sessions)<br><br>(70 minutes plus<br>a 10-minute<br>break; 18<br>supervised and<br>18<br>unsupervised)<br>period. CC:<br><br>(6-8 weeks)<br><br>(36 sessions) | Hypertension<br><br>E: (50/62)<br><br>C: (53/62)<br><br>Diabetes mellitus<br><br>E: (14/62)<br><br>C: (17/62)<br><br>Atrial fibrillation<br><br>E: (10/62)<br><br>C: (4/62)<br><br>Hypercholesterolemia<br><br>E: (40/62)<br><br>C: (39/62) | UL               | Table<br><br>chair<br><br>Computer with<br>monitor,<br>microphone,<br>and speakers<br><br>Verizon<br>wireless<br>modem<br>Myo Band<br>Wiimote in a<br>pistol-shaped<br>holder | Upper limb<br>function<br>(FMA-UE)                | Non-serious<br><br>adverse<br><br>Events:<br><br>6 patients in the<br>experimental group<br>complained from<br>arm and shoulder<br>pain and 5 patients<br>in the control group<br>complained from<br>fatigue and arm and<br>shoulder pain. |

| Study author<br>& year<br>(country) | design | Participants'<br>number (age)                                      | Time from a stroke in<br>days(stage)            | Stroke subtype<br>in %                                                                           | Cognitive state                                                                                                                    | Intervention                                                                                                                                                                                                | Setting of<br>treatment                           | Revision of<br>treatment plan | Dose of<br>exercises                                                                                              | multimorbid<br>conditions<br>(event/total) | Target<br>region | Devices used to<br>deliver VR<br>exercises                                                                                                                               | Primary<br>Outcomes<br>(Outcome<br>measure scale)                                 | Adverse effects |
|-------------------------------------|--------|--------------------------------------------------------------------|-------------------------------------------------|--------------------------------------------------------------------------------------------------|------------------------------------------------------------------------------------------------------------------------------------|-------------------------------------------------------------------------------------------------------------------------------------------------------------------------------------------------------------|---------------------------------------------------|-------------------------------|-------------------------------------------------------------------------------------------------------------------|--------------------------------------------|------------------|--------------------------------------------------------------------------------------------------------------------------------------------------------------------------|-----------------------------------------------------------------------------------|-----------------|
|                                     |        |                                                                    |                                                 |                                                                                                  | and if allowed by<br>the site PI)                                                                                                  |                                                                                                                                                                                                             |                                                   |                               | (70 minutes plus<br>a 10-minute<br>break; 18<br>supervised and<br>18<br>unsupervised)                             |                                            |                  | Power Mate<br>PlayStation 3<br>Eye Move<br>Controller<br>Joystick<br>Logitech<br>Trackpad<br>Standard<br>rehabilitation<br>therapy devices<br>for the upper<br>extremity |                                                                                   |                 |
| Yang.,2022<br>(Hong Kong)           | RCT    | Total ITT=84<br>PP=39<br>E:16 (64.61±9.9)<br>C:23<br>(62.79±13.79) | E: 1339.5±974.5<br>C: 1244.6±992.8<br>(chronic) | E: ischemic<br>68.75%<br>Hemorrhagic<br>31.25%<br>C: ischemic<br>65.21%<br>Hemorrhagic<br>34.78% | Patient must have<br>sufficient<br>cognition to<br>follow the<br>instructions<br>provided by the<br>therapists and the<br>computer | EG: AR exercises in form<br>of the upper-limb (22<br>exercises)<br>and lower-limb (7<br>exercises) motor functions,<br>balance<br>ability (11 exercises),<br>or/and coordination (6<br>exercises) at home . | EG:at home /<br>CG:at<br>rehabilitation<br>centre | weekly                        | EG:<br>(4-10 weeks)<br>20 sessions (2-5<br>per week)<br>120 min per<br>session ( 2-10<br>exercises /<br>session). | NR                                         | UL,<br>LL, Trunk | Microsoft<br>Kinect, a<br>TV/Monitor,<br>and an AR<br>rehabilitation<br>software<br>platform.                                                                            | Upper limb<br>function<br>(FMA-UE)<br>Lower limb<br>function<br>(FMA-LE),<br>Gait | NR              |

| Study author<br>& year<br>(country) | design | Participants'<br>number (age) | Time from a stroke in<br>days(stage) | Stroke subtype<br>in % | Cognitive state | Intervention                                                                                                                                                                                                                                                                                                                                                                                                                                                   | Setting of<br>treatment | Revision of<br>treatment plan | Dose of<br>exercises                                                                              | multimorbid<br>conditions<br>(event/total) | Target<br>region | Devices used to<br>deliver VR<br>exercises | Primary<br>Outcomes<br>(Outcome<br>measure scale) | Adverse effects |
|-------------------------------------|--------|-------------------------------|--------------------------------------|------------------------|-----------------|----------------------------------------------------------------------------------------------------------------------------------------------------------------------------------------------------------------------------------------------------------------------------------------------------------------------------------------------------------------------------------------------------------------------------------------------------------------|-------------------------|-------------------------------|---------------------------------------------------------------------------------------------------|--------------------------------------------|------------------|--------------------------------------------|---------------------------------------------------|-----------------|
|                                     |        |                               |                                      |                        |                 | <b>supervised</b> While the participant was taking the training at home, the human trainer could monitor the training process remotely.<br>CG: AR exercises in form of the upper-limb (22 exercises) and lower-limb (7 exercises) motor functions, balance ability (11 exercises), or/and coordination (6 exercises) at the rehabilitation centres , with 3/4 of each session delivered by a human trainer and the rest of 1/4 delivered by a virtual trainer. |                         |                               | CG:(4-10 weeks)<br>20 sessions (2-5 per week)<br>120 min per session ( 2-10 exercises / session). |                                            |                  |                                            | (FAC),<br>Balance (BBS)                           |                 |

| Study author<br>& year<br>(country) | design | Participants'<br>number (age)                                        | Time from a stroke in<br>days(stage)                   | Stroke subtype<br>in %                                                                                     | Cognitive state                                  | Intervention                                                                                                                                                                                                                                                        | Setting of<br>treatment                              | Revision of<br>treatment plan | Dose of<br>exercises                                                                                                                                                                                         | multimorbid<br>conditions<br>(event/total)                                                                                                                                           | Target<br>region | Devices used to<br>deliver VR<br>exercises                                              | Primary<br>Outcomes<br>(Outcome<br>measure scale)   | Adverse effects |
|-------------------------------------|--------|----------------------------------------------------------------------|--------------------------------------------------------|------------------------------------------------------------------------------------------------------------|--------------------------------------------------|---------------------------------------------------------------------------------------------------------------------------------------------------------------------------------------------------------------------------------------------------------------------|------------------------------------------------------|-------------------------------|--------------------------------------------------------------------------------------------------------------------------------------------------------------------------------------------------------------|--------------------------------------------------------------------------------------------------------------------------------------------------------------------------------------|------------------|-----------------------------------------------------------------------------------------|-----------------------------------------------------|-----------------|
| Adie., 2017<br>(UK)                 | RCT    | Total=235<br><br>E:117<br>(66.8±14.6)<br><br>C:118 (68±11.9)         | E:57.3±48.3<br><br>C:56.3±50.1<br>(chronic)            | E: ischemic<br>88.88%<br><br>Hemorrhagic<br>11.12%<br><br>C: ischemic<br>88.9%<br><br>Hemorrhagic<br>11.1% | NR                                               | EG: WiiTM sports games<br>(bowling, tennis, golf and<br>baseball in a seated position<br><br>CG: tailored arm exercises<br>(based on the Graded<br>Repetitive Arm<br>Supplementary Programme)<br><br>in a seated position ,<br><br><b>(unsupervised exercises).</b> | EG:at home /<br><br>CG: at home.                     | weekly                        | EG:<br><br>(6 weeks)<br><br>(Daily sessions)<br><br>(45 min /<br>session) in a<br>seated position.<br><br>CG:<br><br>(6 weeks)<br><br>(Daily sessions)<br><br>(45 min /<br>session) in a<br>seated position. | diabetes mellitus<br><br>E: (18/117)<br><br>C: (26/118)<br><br>cardiovascular<br><br>E: (43/117)<br><br>C: (57/118)<br><br>respiratory disease<br><br>E: (25/117)<br><br>C: (12/118) | UL               | computer<br><br>screen - remote<br><br>- camera -<br><br>Nintendo Wii<br><br>Sports     | Upper limb<br>function<br>(ARAT)                    | NR              |
| Ballester .,<br>2017<br>(Spain)     | RCT    | Total=35<br><br>E:17 (65.05±<br>10.33)<br><br>C:18 (61.75±<br>12.94) | E:1073.43±767.74<br><br>C: 798.06 ±421.80<br>(chronic) | E: ischemic 67%<br><br>Haemorrhagic<br>33%<br><br>C: ischemic 67%<br><br>Haemorrhagic<br>33%               | Mini-Mental<br>State Evaluation,<br><br>MMSE>22. | EG:The RGS integrates a<br>paradigm of goal-directed<br>action execution and motor<br>imagery <b>(unsupervised<br/>exercises).</b><br><br>CG:horizontal and vertical<br>stacking and unstacking of<br>plastic cups with their right<br>and left hand consecutively  | EG:<br><br>Domiciliary<br><br>CG:<br><br>Domiciliary | NM                            | EG:<br><br>(3 weeks)<br><br>weekly days,<br><br>(20 minutes /<br>session). CG:<br><br>(3 weeks)<br><br>Weekly days,<br><br>(20 minutes<br>/session).                                                         | NM                                                                                                                                                                                   | UL               | pair of data<br>gloves<br><br>equipped with<br><br>bend sensors,<br><br>screen , camera | Upper limb<br>function<br>(FMA-UE)<br><br>,(CAHAI). | NR              |

| Study author<br>& year<br>(country)   | design | Participants'<br>number (age)                     | Time from a stroke in<br>days(stage)                   | Stroke subtype<br>in %                                                                                    | Cognitive state                                                                             | Intervention                                                                                                                                                                                                                                                                                                                                                    | Setting of<br>treatment                     | Revision of<br>treatment plan | Dose of<br>exercises                                                                                                                                  | multimorbid<br>conditions<br>(event/total) | Target<br>region | Devices used to<br>deliver VR<br>exercises   | Primary<br>Outcomes<br>(Outcome<br>measure scale)                        | Adverse effects                                                                                                                                                                                                                      |
|---------------------------------------|--------|---------------------------------------------------|--------------------------------------------------------|-----------------------------------------------------------------------------------------------------------|---------------------------------------------------------------------------------------------|-----------------------------------------------------------------------------------------------------------------------------------------------------------------------------------------------------------------------------------------------------------------------------------------------------------------------------------------------------------------|---------------------------------------------|-------------------------------|-------------------------------------------------------------------------------------------------------------------------------------------------------|--------------------------------------------|------------------|----------------------------------------------|--------------------------------------------------------------------------|--------------------------------------------------------------------------------------------------------------------------------------------------------------------------------------------------------------------------------------|
|                                       |        |                                                   |                                                        |                                                                                                           |                                                                                             | without<br>assistance. <b>(unsupervised<br/>exercises)</b>                                                                                                                                                                                                                                                                                                      |                                             |                               |                                                                                                                                                       |                                            |                  |                                              |                                                                          |                                                                                                                                                                                                                                      |
| Lee ., 2022<br>(Republic of<br>Korea) | RCT    | ITT=56<br>E:29 (60.4±14.4)<br>C:27<br>(66.1±10.6) | E: 52.5 ±56.0<br>C: 33.4 ±51.6<br>(subacute , chronic) | E: ischemic<br>86.2%<br><br>Haemorrhagic<br>13.8%<br><br>C: ischemic<br>96.3%<br><br>Haemorrhagic<br>3.7% | Mini-Mental<br>State Evaluation,<br>MMSE>22.                                                | EG:UINCARE HomeVR<br>device at home , to train the<br>control, endurance, speed,<br>accuracy, and range of<br>motion of the upper<br>extremities and trunk , hips<br>and whole body in form of<br>10 levels of progression.<br>CG:conventional exercise<br>program ( stretching,<br>aerobic, and strengthening<br>exercises with a written and<br>pictorial HEP | EG:at home,<br>CG:at home                   | weekly                        | EG :<br>(4 weeks)<br><br>5 sessions<br><br>/ week. (30min /<br>session)<br><br>CG:<br>(4 weeks)<br><br>5 sessions<br><br>/ week. (30min /<br>session) | NR                                         | Whole<br>body    | sensors ,<br>camera ,<br>computer<br>screen  | Mobility<br>(TUG, POMA)<br><br>Balance (BBS<br>) Fear of fall<br>(FES-I) | 1 participant<br>complained from<br>infratentorial<br>ischemic stroke due<br>to vertebral artery<br>dissection (TIA)<br>after performing<br>excessive head<br>rotation during a<br>rotation exercise of<br>the trunk for 3<br>weeks. |
| Piron ., 2009<br>(Italy)              | RCT    | Total=36<br>E:18 (66±7.9)<br>C:18 ( 64.4±7.9)     | E:445.3±200.75<br>C:361.3±112.42<br>(chronic)          | E: ischemic<br>100%<br><br>C: ischemic<br>100%                                                            | Patients with<br>clinical evidence<br>of cognitive<br>impairment, such<br>as apraxia (score | EG: 5 virtual motor tasks /<br>supervised via<br>videoconferencing.<br>CG:conventional<br>physiotherapy exercises for                                                                                                                                                                                                                                           | EG:at home ,<br>CG:local<br>health district | NR                            | EG:<br>(4 weeks)<br><br>5 sessions /<br>week.                                                                                                         | NR                                         | UL               | 3D motion<br>tracking system<br><br>/ screen | upper limb<br>function<br>(FMA-UE)                                       | NR                                                                                                                                                                                                                                   |



| Study author<br>& year<br>(country) | design | Participants'<br>number (age)                                      | Time from a stroke in<br>days(stage)                  | Stroke subtype<br>in %                                                                                 | Cognitive state                                                   | Intervention                                                                                                                                                                                                                                                                                                                                                                                   | Setting of<br>treatment          | Revision of<br>treatment plan | Dose of<br>exercises                                                                                                                                            | multimorbid<br>conditions<br>(event/total) | Target<br>region                                                                                      | Devices used to<br>deliver VR<br>exercises | Primary<br>Outcomes<br>(Outcome<br>measure scale) | Adverse effects |
|-------------------------------------|--------|--------------------------------------------------------------------|-------------------------------------------------------|--------------------------------------------------------------------------------------------------------|-------------------------------------------------------------------|------------------------------------------------------------------------------------------------------------------------------------------------------------------------------------------------------------------------------------------------------------------------------------------------------------------------------------------------------------------------------------------------|----------------------------------|-------------------------------|-----------------------------------------------------------------------------------------------------------------------------------------------------------------|--------------------------------------------|-------------------------------------------------------------------------------------------------------|--------------------------------------------|---------------------------------------------------|-----------------|
|                                     |        |                                                                    |                                                       |                                                                                                        | lower than 62<br>points at the De<br>Renzi Test) was<br>excluded. | the upper limb with a<br>strategy of progressive<br>complexity.                                                                                                                                                                                                                                                                                                                                |                                  |                               | (60 min<br>/session) CG:<br>(4 weeks)<br>5 sessions /<br>week.<br>(60 min<br>/session)                                                                          |                                            |                                                                                                       |                                            |                                                   |                 |
| Llore´s .,<br>2015<br>(Spain)       | RCT    | Total=30<br><br>E:15 (55.47±<br>9.63)<br><br>C:15 ( 55.6±<br>7.29) | E:334.13±60.79<br><br>C:316.73±49.81<br><br>(chronic) | E: ischemic<br>60%<br><br>Haemorrhagic<br>40%<br><br>C: ischemic<br>66.7%<br><br>Haemorrhagic<br>33.3% | Mini-Mental<br>State<br>Examination<br>score >23                  | EG:The virtual environment<br>used in the experiment<br>represented the participants'<br>feet and their movements in<br>an empty scenario, which<br>consisted of a checkered<br>floor that facilitated the<br>perception of depth, with a<br>central circle that<br>represented the center of the<br>virtual environment.,<br>(unsupervised )<br><br>CG:The virtual<br>environment used in the | EG:at home ,<br><br>CG:at clinic | weekly                        | EG : (20<br>sessions)<br><br>3 sessions /<br>week.<br>(45 min /<br>session).<br><br>CG: (20<br>sessions)<br><br>3 sessions /<br>week.<br>(45 min /<br>session). | NR                                         | Trunk, LL<br><br>television,<br><br>conventional<br>computer or<br>labtop,<br><br>Microsoft<br>Kinect | Balance<br>(BBS)                           | NR                                                |                 |

| Study author<br>& year<br>(country) | design           | Participants'<br>number (age)   | Time from a stroke in<br>days(stage)   | Stroke subtype<br>in % | Cognitive state                                   | Intervention                                                                                                                                                                                                                                         | Setting of<br>treatment    | Revision of<br>treatment plan | Dose of<br>exercises                                                                                                                       | multimorbid<br>conditions<br>(event/total) | Target<br>region | Devices used to<br>deliver VR<br>exercises | Primary<br>Outcomes<br>(Outcome<br>measure scale) | Adverse effects |
|-------------------------------------|------------------|---------------------------------|----------------------------------------|------------------------|---------------------------------------------------|------------------------------------------------------------------------------------------------------------------------------------------------------------------------------------------------------------------------------------------------------|----------------------------|-------------------------------|--------------------------------------------------------------------------------------------------------------------------------------------|--------------------------------------------|------------------|--------------------------------------------|---------------------------------------------------|-----------------|
|                                     |                  |                                 |                                        |                        |                                                   | experiment represented the participants' feet and their movements in an empty scenario, which consisted of a checkered floor that facilitated the perception of depth, with a central circle that represented the center of the virtual environment. |                            |                               |                                                                                                                                            |                                            |                  |                                            |                                                   |                 |
| Zondervan .,<br>2016<br>(USA)       | RCT<br>crossover | Total=17<br>E:9 (60)<br>C:8(59) | E:1945±1511<br>C:1157±605<br>(chronic) | NM                     | Patients are<br>excluded if they<br>have apraxia. | EG:MusicGlove therapy<br>(unsupervised exercises)<br>CG:conventional therapy<br>group using a booklet of<br>tabletop exercises.                                                                                                                      | EG:at home ,<br>CG:at home | weekly                        | EG:<br>(3 weeks)<br>3 sessions /<br>week.<br>(60 min /<br>session).<br>CG:<br>(3 weeks)<br>3 sessions /<br>week.<br>(60 min /<br>session). | NR                                         | UL,<br>hand      | MusicGlove<br>device and a<br>laptop       | Upper limb<br>function<br>(BBT)                   | NR              |

| Study author<br>& year<br>(country)      | design | Participants’<br>number (age)                                                                                                                                                                                                                                                                                                                                                                                                                                                                                               | Time from a stroke in<br>days(stage)                                                      | Stroke subtype<br>in %                                                                                                                   | Cognitive state                                                                                                               | Intervention                                                                                                                                                                                                                                  | Setting of<br>treatment        | Revision of<br>treatment plan | Dose of<br>exercises                                                                                                                                                                               | multimorbid<br>conditions<br>(event/total) | Target<br>region | Devices used to<br>deliver VR<br>exercises                       | Primary<br>Outcomes<br>(Outcome<br>measure scale) | Adverse effects |
|------------------------------------------|--------|-----------------------------------------------------------------------------------------------------------------------------------------------------------------------------------------------------------------------------------------------------------------------------------------------------------------------------------------------------------------------------------------------------------------------------------------------------------------------------------------------------------------------------|-------------------------------------------------------------------------------------------|------------------------------------------------------------------------------------------------------------------------------------------|-------------------------------------------------------------------------------------------------------------------------------|-----------------------------------------------------------------------------------------------------------------------------------------------------------------------------------------------------------------------------------------------|--------------------------------|-------------------------------|----------------------------------------------------------------------------------------------------------------------------------------------------------------------------------------------------|--------------------------------------------|------------------|------------------------------------------------------------------|---------------------------------------------------|-----------------|
| Hernandez .,<br><br>2022<br><br>(canada) | RCT    | Total=51<br><br>E:26 ( 59.8±<br>13.1)<br><br>C:25 ( 56.7±<br>11.2)                                                                                                                                                                                                                                                                                                                                                                                                                                                          | E: median (IQR) 5.3<br>(1.5-8.1)<br><br>C: median (IQR) 4.4<br>(2.2-7.4)<br><br>(chronic) | E: ischemic<br>54%<br><br>Haemorrhagic<br>27%<br><br>Unknown 19%<br><br>C: ischemic<br>40%<br><br>Haemorrhagic<br>28%<br><br>Unknown 32% | Patients are<br><br>excluded if they<br><br>have difficulty in<br><br>understanding<br><br>simple verbal<br><br>instructions. | EG:home-based exercise<br>program via the Jintronix<br>system monitored offline by<br>a therapist for upper limb<br>exercises. CG:home-based<br>exercise program manual<br>[GRASP] provided by a<br>therapist without further<br>supervision. | EG:at home ,<br><br>CG:at home | twice/<br><br>week            | EG:5 sessions /<br><br>week ( ≥20 min<br><br>/ session) CG:<br><br>Participant was<br><br>encouraged to<br><br>engage in the<br><br>program as<br><br>many times a<br><br>week as<br><br>possible. | NR                                         | UL               | computer, large<br><br>screen ,<br><br>Microsoft<br><br>Kinect . | Upper limb<br><br>function<br><br>(FMA-UE)        | NR              |
|                                          |        | ARAT:action research arm test.BBS:balance berg scale.CAHAI: Chedoke Arm and Hand Activity Inventory.CG:control group.EG:experimental group.FAC:functional ambulation category.<br><br>FES-I:fall efficacy scale -international.GRASP : Graded Repetitive Arm Supplementary Program.HEP:home-based exercise program.LL:lower limb.NR : not reported.POMA:performance oriented mobility assessment.RCT:randomised controlled trial.TIA:transient ischemic<br>attack.TUG:time up and go test.UL:upper limb.VR:virtual reality. |                                                                                           |                                                                                                                                          |                                                                                                                               |                                                                                                                                                                                                                                               |                                |                               |                                                                                                                                                                                                    |                                            |                  |                                                                  |                                                   |                 |

Table S6:Summary of quantitative outcomes .

| Study          | Motor outcomes                                     |                                                  |                     |   |                 |   |          |   |         |   |      |   |      |   |
|----------------|----------------------------------------------------|--------------------------------------------------|---------------------|---|-----------------|---|----------|---|---------|---|------|---|------|---|
|                | Upper limb and hand function                       |                                                  | Lower limb function |   | Muscle strength |   | Mobility |   | balance |   | Gait |   | Fall |   |
|                | W                                                  | B                                                | W                   | B | W               | B | W        | B | W       | B | W    | B | W    | B |
| Cramer ., 2019 | (FMA UE)<br><br>↑ + *<br><br>(Box and blocks test) | (FMA UE)<br><br>↑ +<br><br>(Box and blocks test) |                     |   |                 |   |          |   |         |   |      |   |      |   |

|                   |                                                                                                    |                                                                                                      |                   |                            |                                                                              |                                                                              |                                               |                                                     |                                        |                                     |            |                  |                                               |                                               |
|-------------------|----------------------------------------------------------------------------------------------------|------------------------------------------------------------------------------------------------------|-------------------|----------------------------|------------------------------------------------------------------------------|------------------------------------------------------------------------------|-----------------------------------------------|-----------------------------------------------------|----------------------------------------|-------------------------------------|------------|------------------|-----------------------------------------------|-----------------------------------------------|
|                   | ↑ + * (1 month)<br>NR (follow-up)<br>(Stroke Impact Scale<br>hand motor domain<br>scores)<br>↑ + * | ↑ + (1 month)<br>NR (follow-up)<br>(Stroke Impact Scale<br>hand motor domain<br>scores)<br>↑ + ?     |                   |                            |                                                                              |                                                                              |                                               |                                                     |                                        |                                     |            |                  |                                               |                                               |
| Yang ., 2022      | (FMA UE)<br>↑ + *                                                                                  | (FMA UE)<br>↑ +<br>P=0.76                                                                            | (FMA LE)<br>↑ + * | (FMA LE)<br>↑ +<br>P=0.843 |                                                                              |                                                                              |                                               |                                                     | (BBS)<br>↑                             | (BBS)<br>P=0.452                    | (FAC)<br>↑ | (FAC)<br>P=0.122 |                                               |                                               |
| Adie ., 2017      | ARAT<br>↑ + *                                                                                      | ARAT<br>↑ +<br>p = 0.12                                                                              |                   |                            |                                                                              |                                                                              |                                               |                                                     |                                        |                                     |            |                  |                                               |                                               |
| Ballester ., 2017 | (FMA UE)<br>↑ (week 3)<br>↓ (week 12)<br>(CAHAI )<br>↑+ * (week 3)<br>↓ ? (week 12)                | (FMA UE)<br>P=0.33 (week 3)<br>P=0.21 (week 12)<br>(CAHAI )<br>P=0.05 * (week 3)<br>P=0.61 (week 12) |                   |                            | (MRC-p)<br>↑ (3 week)<br>↓ (12 week)<br>(MRC-d)<br>↑ (3 week)<br>↑ (12 week) | (MRC-p)<br>P=0.61(3 week)<br>P=0.06 (12 week)<br>(MRC-d)<br>P=0.74<br>P=0.98 |                                               |                                                     |                                        |                                     |            |                  |                                               |                                               |
| Lee ., 2022       |                                                                                                    |                                                                                                      |                   |                            |                                                                              |                                                                              | (TUG)<br>↓ + * (post)<br>↓ + * (follow<br>up) | (TUG)<br>↓ + * (post)<br>p=0.016<br>↓ + (follow up) | (BBS)<br>↑+* (post)<br>↑+* (follow up) | (BBS)<br>↑ +(post)<br>↑+(follow up) |            |                  | (FES-I)<br>↓+ * (post)<br>↓+ * (follow<br>up) | (FES-I)<br>↓+ * (post)<br>↓+ * (follow<br>up) |

|                   |                                                                   |                                                               |  |  |  |  |                                     |                                     |                                                                                                                               |                                                                                                                              |                                           |                                        |  |  |
|-------------------|-------------------------------------------------------------------|---------------------------------------------------------------|--|--|--|--|-------------------------------------|-------------------------------------|-------------------------------------------------------------------------------------------------------------------------------|------------------------------------------------------------------------------------------------------------------------------|-------------------------------------------|----------------------------------------|--|--|
|                   |                                                                   |                                                               |  |  |  |  | (POMA)<br>↑ (post)<br>↑ (follow up) | (POMA)<br>? (post)<br>? (Follow up) |                                                                                                                               |                                                                                                                              |                                           |                                        |  |  |
| Piron ., 2009     | (FMA UE)<br>↑ + *(initial<br>assessment)<br>↑ + * (follow up)     | (FMA UE)<br>↑ + *(initial<br>assessment)<br>↑ + * (follow up) |  |  |  |  |                                     |                                     |                                                                                                                               |                                                                                                                              |                                           |                                        |  |  |
| Llore´ns ., 2015  |                                                                   |                                                               |  |  |  |  |                                     |                                     | (BBS)<br>↑+* (post)<br>↑+* (follow up)<br>(POMA-B)<br>↑+* (post)<br>↑+* (follow up)<br>(BBA)<br>↑+* (post)<br>↑+* (follow up) | (BBS)<br>↑ +(post)<br>↑+(follow up)<br>(POMA-B)<br>↑ +(post)<br>↑+(follow up)<br>(BBA)<br>↑ +<br>(post)<br>↑+<br>(follow up) | (POMA-G)<br>↑+* (post)<br>↑+* (follow up) | (POMA-G)<br>↑ +(post)<br>↑+(follow up) |  |  |
| Zondervan ., 2016 | (ARAT)<br>↑ + (initial analysis)<br>↑ + * (crossover<br>analysis) | (ARAT)<br>↑ + (initial analysis)<br>P=0.29                    |  |  |  |  |                                     |                                     |                                                                                                                               |                                                                                                                              |                                           |                                        |  |  |

|                                                                                                                                                                                                                                      |                                                                                                                                                                                                                                                                 |                                                                                                                                                                                                                                                                                                                                                        |  |  |  |  |  |  |  |  |  |  |  |  |
|--------------------------------------------------------------------------------------------------------------------------------------------------------------------------------------------------------------------------------------|-----------------------------------------------------------------------------------------------------------------------------------------------------------------------------------------------------------------------------------------------------------------|--------------------------------------------------------------------------------------------------------------------------------------------------------------------------------------------------------------------------------------------------------------------------------------------------------------------------------------------------------|--|--|--|--|--|--|--|--|--|--|--|--|
|                                                                                                                                                                                                                                      | (Nine hole pig test)<br>↑ + (initial analysis)<br><br>(Box and blocks test)<br>↑ + ? (initial analysis)<br><br>Motor Activity Log<br>(quality of movement)<br>↑ + ? (initial analysis)<br><br>Motor Activity Log<br>(amount of use)<br>↑ + ? (initial analysis) | ↑ + * (crossover analysis)<br><br>(Nine hole pig test)<br>↑ + (initial analysis)<br><br>P=0.33<br><br>(Box and blocks test)<br>↑ + (initial analysis)<br><br>P=0.25<br><br>Motor Activity Log<br>(quality of movement)<br>↑ + *(initial analysis)<br><br>P=0.007<br><br>Motor Activity Log<br>(amount of use)<br>↑ + *(initial analysis)<br><br>P=0.04 |  |  |  |  |  |  |  |  |  |  |  |  |
| Hernandez ., 2022                                                                                                                                                                                                                    | (FMA UE)<br>↑ + *                                                                                                                                                                                                                                               | (FMA UE)<br>↑ + *                                                                                                                                                                                                                                                                                                                                      |  |  |  |  |  |  |  |  |  |  |  |  |
| W= within intervention group<br><br>B=between intervention and control group<br><br>↑= increase value within the intervention group<br><br>↓=decrease value within the interventional group<br><br>+ = positive change (improvement) |                                                                                                                                                                                                                                                                 |                                                                                                                                                                                                                                                                                                                                                        |  |  |  |  |  |  |  |  |  |  |  |  |

- = negative change (no improvement)

\*Significant difference

? significance not reported.

NR= not reported

Table S7 (summary of the quantitative outcome effect measures)

| Study             |                                 | Upper limb function                                             |      |                                                            |      |                          |       |                 |       |                     |     |                 |     |                                              |     |                 |     |                    |     |                 |       |                 |       |                 |     |                           |      |                 |      |                     |      |         |      |
|-------------------|---------------------------------|-----------------------------------------------------------------|------|------------------------------------------------------------|------|--------------------------|-------|-----------------|-------|---------------------|-----|-----------------|-----|----------------------------------------------|-----|-----------------|-----|--------------------|-----|-----------------|-------|-----------------|-------|-----------------|-----|---------------------------|------|-----------------|------|---------------------|------|---------|------|
|                   |                                 | FM motor score UE                                               |      |                                                            |      | Action research arm test |       |                 |       | Box and Blocks Test |     |                 |     | Stroke Impact Scale hand motor domain scores |     |                 |     | Nine Hole Peg Test |     |                 |       | CAHAI           |       |                 |     | MAL (quality of movement) |      |                 |      | MAL (amount of use) |      |         |      |
|                   |                                 | Experimental                                                    |      | Control                                                    |      | Experimental             |       | Control         |       | Experimental        |     | Control         |     | Experimental                                 |     | Control         |     | Experimental       |     | Control         |       | Experimental    |       | Control         |     | Experimental              |      | Control         |      | Experimental        |      | Control |      |
|                   |                                 | Mean difference                                                 | SD   | Mean difference                                            | SD   | Mean difference          | S D   | Mean difference | S D   | Mean difference     | SD  | Mean difference | SD  | Mean difference                              | SD  | Mean difference | SD  | Mean difference    | S D | Mean difference | S D   | Mean difference | S D   | Mean difference | S D | Mean difference           | S D  | Mean difference | S D  | Mean difference     | S D  |         |      |
| Cramer ., 2019    | baseline to 30 days             | 7.86                                                            | 6.68 | 8.36                                                       | 7.04 |                          |       |                 |       | 9.5                 | N R | 8.8             | N R | 23.7                                         | N R | 29.2            | N R |                    |     |                 |       |                 |       |                 |     |                           |      |                 |      |                     |      |         |      |
| Yang ., 2022      | baseline-post                   | 2.04                                                            | 4.57 | 2.34                                                       | 3.98 |                          |       |                 |       |                     |     |                 |     |                                              |     |                 |     |                    |     |                 |       |                 |       |                 |     |                           |      |                 |      |                     |      |         |      |
| Adie., 2017       | baseline-post (6 weeks)         |                                                                 |      |                                                            |      | 6.28                     | 9.22  | 7.63            | 9.36  |                     |     |                 |     |                                              |     |                 |     |                    |     |                 |       |                 |       |                 |     |                           |      |                 |      |                     |      |         |      |
|                   | baseline-post (6 months)        |                                                                 |      |                                                            |      | 7.49                     | 10.54 | 8.73            | 12.59 |                     |     |                 |     |                                              |     |                 |     |                    |     |                 |       |                 |       |                 |     |                           |      |                 |      |                     |      |         |      |
| Ballester ., 2017 | baseline-post (week 3)          | 0.35                                                            | 1.62 | 1.22                                                       | 3.84 |                          |       |                 |       |                     |     |                 |     |                                              |     |                 |     |                    |     |                 | 1.53  | 2.4             | -0.67 | 6.01            |     |                           |      |                 |      |                     |      |         |      |
|                   | baseline-post (week 12)         | -0.18                                                           | 3.5  | 1.39                                                       | 3.63 |                          |       |                 |       |                     |     |                 |     |                                              |     |                 |     |                    |     |                 | -0.06 | 6.51            | 0.44  | 5.46            |     |                           |      |                 |      |                     |      |         |      |
| Piron ., 2009     | T30-T60                         | T30 = 48.5* (7.8), T60 = 53.6* (7.7). results are in mean (SD). |      | T30=47.3 (4.6) , 49.5 (4.8). results are in mean (SD).     |      |                          |       |                 |       |                     |     |                 |     |                                              |     |                 |     |                    |     |                 |       |                 |       |                 |     |                           |      |                 |      |                     |      |         |      |
|                   | T60-T90                         | T60 = 53.6 (7.7) , T90 = 53.1 (7.3). results are in mean (SD).  |      | T60=49.5 (4.8) , T90=48.8 (5.1). results are in mean (SD). |      |                          |       |                 |       |                     |     |                 |     |                                              |     |                 |     |                    |     |                 |       |                 |       |                 |     |                           |      |                 |      |                     |      |         |      |
| Zondervan ., 2016 | baseline-1 month post treatment |                                                                 |      |                                                            |      | 0.7                      | 2.3   | -0.6            | 2.9   | 2.3                 | 6.2 | 4.3             | 5   |                                              |     |                 |     | 1.3                | 6.9 | -0.2            | 6     |                 |       |                 |     | 0.82                      | 0.48 | 0.09            | 0.58 | 0.86                | 0.64 | 0.26    | 0.69 |
| Hernandez ., 2022 | NO DATA AVAILABLE               | NR                                                              |      | NR                                                         |      |                          |       |                 |       |                     |     |                 |     |                                              |     |                 |     |                    |     |                 |       |                 |       |                 |     |                           |      |                 |      |                     |      |         |      |

All results presented in mean difference (SD) except results with [\*].  
NR = not reported

| Study                                                                                                                   |                               | Lower limb function |      |                 |      | Muscle strength |      |                 |      |                 |      |                 |      | Mobility        |                       |                 |                      |                 |    |                 |    |
|-------------------------------------------------------------------------------------------------------------------------|-------------------------------|---------------------|------|-----------------|------|-----------------|------|-----------------|------|-----------------|------|-----------------|------|-----------------|-----------------------|-----------------|----------------------|-----------------|----|-----------------|----|
|                                                                                                                         |                               | FM motor score LE   |      |                 |      | MRC proximal    |      |                 |      | MRC distal      |      |                 |      | TUG             |                       |                 |                      | POMA            |    |                 |    |
|                                                                                                                         |                               | Experimental        |      | Control         |      | Experimental    |      | Control         |      | Experimental    |      | Control         |      | Experimental    |                       | Control         |                      | Experimental    |    | Control         |    |
|                                                                                                                         |                               | Mean difference     | SD   | Mean difference | SD   | Mean difference | SD   | Mean difference | SD   | Mean difference | SD   | Mean difference | SD   | Mean difference | SD                    | Mean difference | SD                   | Mean difference | SD | Mean difference | SD |
| Cramer ., 2019                                                                                                          | baseline to 30 days           |                     |      |                 |      |                 |      |                 |      | 9.5             | NR   | 8.8             | NR   | 23.7            | NR                    | 29.2            | NR                   |                 |    |                 |    |
| Yang ., 2022                                                                                                            | baseline-post                 | 1.84                | 3.45 | 1.63            | 4.85 |                 |      |                 |      |                 |      |                 |      |                 |                       |                 |                      |                 |    |                 |    |
| Ballester ., 2017                                                                                                       | baseline-post (week 3)        |                     |      |                 |      | 0.06            | 0.24 | 0.11            | 0.32 | 0.06            | 0.43 | 0.11            | 0.47 |                 |                       |                 |                      |                 |    |                 |    |
|                                                                                                                         | baseline-post (week 12)       |                     |      |                 |      | -0.12           | 0.78 | 0.28            | 0.46 | 0.29            | 0.77 | 0.17            | 0.62 |                 |                       |                 |                      |                 |    |                 |    |
| Lee ., 2022                                                                                                             | baseline - post (4 weeks)     |                     |      |                 |      |                 |      |                 |      |                 |      |                 |      | 2.3             | *[95% CI) 1.22, 3.38] | 0.91            | *[95% CI 0.13, 1.68] | -0.9            | NM | -0.7            | NM |
|                                                                                                                         | baseline -follow up (4 weeks) |                     |      |                 |      |                 |      |                 |      |                 |      |                 |      | 2.47            | *[95% CI 1.39, 3.54]  | 1.61            | *[95% CI 0.82, 2.40] | -1.2            | NM | -0.9            | NM |
| All results presented in mean difference (SD) except results with [*].<br>NR = not reported<br>CI = confidence interval |                               |                     |      |                 |      |                 |      |                 |      |                 |      |                 |      |                 |                       |                 |                      |                 |    |                 |    |

| Study                                                                                                                   |                               | Balance         |      |                 |      |                 |                        |                 |                        | Gait            |      |                 |     |                 |      |                 |     | Fall            |    |                 |    |
|-------------------------------------------------------------------------------------------------------------------------|-------------------------------|-----------------|------|-----------------|------|-----------------|------------------------|-----------------|------------------------|-----------------|------|-----------------|-----|-----------------|------|-----------------|-----|-----------------|----|-----------------|----|
|                                                                                                                         |                               | POMA-B          |      |                 |      | BBS             |                        |                 |                        | POMA-G          |      |                 |     | FAC             |      |                 |     | FES-I           |    |                 |    |
|                                                                                                                         |                               | Experimental    |      | Control         |      | Experimental    |                        | Control         |                        | Experimental    |      | Control         |     | Experimental    |      | Control         |     | Experimental    |    | Control         |    |
|                                                                                                                         |                               | Mean difference | SD   | Mean difference | SD   | Mean difference | SD                     | Mean difference | SD                     | Mean difference | SD   | Mean difference | SD  | Mean difference | SD   | Mean difference | SD  | Mean difference | SD | Mean difference | SD |
| Yang ., 2022                                                                                                            | baseline-post                 |                 |      |                 |      | 1.88            | 5.09                   | 1.13            | 3.69                   |                 |      |                 |     | 0.26            | 0.83 | 0.08            | 0.6 |                 |    |                 |    |
| Lee ., 2022                                                                                                             | baseline - post (4 weeks)     |                 |      |                 |      | -2.66           | *[95% CI -4.38, -0.94] | -1.67           | *[95% CI -2.88, -0.45] |                 |      |                 |     |                 |      |                 |     | -3.4            | NR | 0.4             | NR |
|                                                                                                                         | baseline -follow up (4 weeks) |                 |      |                 |      | -3.17           | *[95% CI -5.10, -1.24] | -2.41           | *[95% CI -3.66, -1.16] |                 |      |                 |     |                 |      |                 |     | -5.1            | NR | -0.3            | NR |
| Llore´ns ., 2015                                                                                                        | base line to week 8           | 0.86            | 1.5  | 0.26            | 0.45 | 3.66            | 2.38                   | 2.26            | 1.76                   | 0.93            | 0.59 | 0.4             | 0.6 |                 |      |                 |     |                 |    |                 |    |
|                                                                                                                         | week 8 to week 12             | 0.67            | 0.59 | 0.2             | 0.41 | 0.33            | 0.61                   | 0.67            | 0.17                   | 0.07            | 0.45 | 0.13            | 0.3 |                 |      |                 |     |                 |    |                 |    |
| All results presented in mean difference (SD) except results with [*].<br>NR = not reported<br>CI = confidence interval |                               |                 |      |                 |      |                 |                        |                 |                        |                 |      |                 |     |                 |      |                 |     |                 |    |                 |    |



Table S8:Summary of qualitative studies characteristics .

| Study author & year (country)       | Objectives                                                                                                                               | design                            | Participants' number (age)                                                             | Gender                  | Stage of stroke  | Intervention                                                   | Setting of treatment | Inclusion criteria                                                                                                                                                | Exclusion criteria                                                                                                                                                                                                                                                                             | Mode of delivery of VR | Target region | Outcomes                                                                                                           | Underlying theory                                                                                      | Methods of data collection                                     | Methods of data analysis |
|-------------------------------------|------------------------------------------------------------------------------------------------------------------------------------------|-----------------------------------|----------------------------------------------------------------------------------------|-------------------------|------------------|----------------------------------------------------------------|----------------------|-------------------------------------------------------------------------------------------------------------------------------------------------------------------|------------------------------------------------------------------------------------------------------------------------------------------------------------------------------------------------------------------------------------------------------------------------------------------------|------------------------|---------------|--------------------------------------------------------------------------------------------------------------------|--------------------------------------------------------------------------------------------------------|----------------------------------------------------------------|--------------------------|
| Dorra Rakia Allegue., 2022 (Canada) | To explore the indicators of empowerment among stroke survivors, and investigate the determinants of VirTele use among stroke survivors' | (qualitative) multiple case study | 3 patients<br><br>Mean ± sd<br>(58.8 ±19.4)                                            | 1 male<br><br>2 female  | Chronic          | VirTele exercises using the Jintronix exergame for UE training | At home              | First-time unilateral ischemic or hemorrhagic stroke or no residual deficits from a previous stroke.<br><br>Patient can move the game avatar with impaired limb). | Medically unstable (eg, uncontrolled cardiac condition).<br><br>Severe cognitive or communication deficits.<br><br>Visual impairments limiting the ability to use the games.<br><br>UE mobility restrictions limiting the ability to play (eg, restricted shoulder movements because of pain)' | non-immersive          | UE            | 1- indicators of empowerment among stroke survivors.<br><br>2- determinants of VirTele use among stroke survivors. | UTAUT (The Unified Theory of Acceptance and Use of Technology).<br><br>SDT (self-determination theory) | semi structured interviews (lasting from 30 minutes to 1 hour) | thematic analysis        |
| Wingham.,2015 (UK)                  | To understand stroke survivors and their caregivers' experience and acceptability of using the Nintendo Wii Sports™                      | (qualitative)                     | 18 patients- 10 caregiver<br><br>Age of participants : median (min–max age) 65 (35–84) | 11 male<br><br>7 female | Subacute-chronic | Wii games included bowling, tennis, golf, boxing and baseball  | At home              | Patient is able to take part in semistructured interview.<br><br>Aged 18 or over and could give informed consent.                                                 | NR                                                                                                                                                                                                                                                                                             | Semi-immersive         | UE            | experience and acceptability of using the Wii games in stroke telerehabilitation.                                  | no underlying theory reported                                                                          | Semi-structured interviews                                     | thematic analysis        |

| Study author & year (country) | Objectives                                                                                                                        | design        | Participants' number (age)        | Gender              | Stage of stroke  | Intervention                                                                                                                                                                                                                                                                                                                                              | Setting of treatment | Inclusion criteria                                                                                                                                                                                                      | Exclusion criteria                                                                                  | Mode of delivery of VR | Target region | Outcomes                                         | Underlying theory                                              | Methods of data collection | Methods of data analysis |
|-------------------------------|-----------------------------------------------------------------------------------------------------------------------------------|---------------|-----------------------------------|---------------------|------------------|-----------------------------------------------------------------------------------------------------------------------------------------------------------------------------------------------------------------------------------------------------------------------------------------------------------------------------------------------------------|----------------------|-------------------------------------------------------------------------------------------------------------------------------------------------------------------------------------------------------------------------|-----------------------------------------------------------------------------------------------------|------------------------|---------------|--------------------------------------------------|----------------------------------------------------------------|----------------------------|--------------------------|
|                               | games (WiiTM) as a home-based arm rehabilitation tool                                                                             |               |                                   |                     |                  |                                                                                                                                                                                                                                                                                                                                                           |                      |                                                                                                                                                                                                                         |                                                                                                     |                        |               |                                                  |                                                                |                            |                          |
| Standen ., 2014 (UK)          | To determine patients experience of using the glove and barriers to using it in the recommended way and to the recommended levels | (qualitative) | 11 patients (NR)                  | 5 male<br>6 female  | Subacute-chronic | virtual glove and games (Spacerace required pronation and supination of the hand to guide a spacecraft through obstacles. Spongeball required the user to open his or her fist and extend the fingers in order to release a ball to hit a target. Balloonpop required a balloon to be grasped and popped by moving it to a pin protruding from the floor) | At home              | aged 18 years or older, had a confirmed diagnosis of stroke, were no longer receiving any other intensive rehabilitation (intermediate care, early supported discharge), and still had residual upper limb dysfunction. | NR                                                                                                  | Semi-immersive         | Hand          | experience of using the glove                    | no underlying theory reported                                  | Semi-structured interviews | thematic analysis        |
| Chen ., 2020 (USA)            | To explore user acceptance of a homebased stroke telerehabilitation system                                                        | (qualitative) | 13 patients mean±sd (70.61±11.14) | 11 male<br>2 female | subacute         | The system delivers treatment sessions in the form of daily guided rehabilitation games, exercises for UL , and stroke education in the patient's home.                                                                                                                                                                                                   | At home              | 1.Age ≥18 years at the time of randomization<br>2.Stroke that is radiologically verified, due to ischemia or to intracerebral hemorrhage,                                                                               | 1.A major, active, coexistent neurological or psychiatric disease, including alcoholism or dementia | non-immersive          | UE            | user acceptance of the telerehabilitation system | UTAUT (The Unified Theory of Acceptance and Use of Technology) | Semi-structured interviews | thematic analysis        |

| Study author & year (country) | Objectives | design | Participants' number (age) | Gender | Stage of stroke | Intervention | Setting of treatment | Inclusion criteria                                                                                                                                                                                                                                                                                                                                       | Exclusion criteria                                                                                                                                                                                                                                                                                                                                                                                                                                                                                                                        | Mode of delivery of VR | Target region | Outcomes | Underlying theory | Methods of data collection | Methods of data analysis |
|-------------------------------|------------|--------|----------------------------|--------|-----------------|--------------|----------------------|----------------------------------------------------------------------------------------------------------------------------------------------------------------------------------------------------------------------------------------------------------------------------------------------------------------------------------------------------------|-------------------------------------------------------------------------------------------------------------------------------------------------------------------------------------------------------------------------------------------------------------------------------------------------------------------------------------------------------------------------------------------------------------------------------------------------------------------------------------------------------------------------------------------|------------------------|---------------|----------|-------------------|----------------------------|--------------------------|
|                               |            |        |                            |        |                 |              |                      | and with time of stroke onset 4–36 weeks prior to randomization<br>3.Arm motor FM score of 22–56 (out of 66, higher is better) at the Screening Visit<br>4.Box & Block Test score with affected arm is at least 3 blocks in 60 seconds at the Screening Visit<br>5.Informed consent signed by the subject<br>6.Behavioral contract signed by the subject | 2.A diagnosis (apart from the index stroke) that substantially affects paretic arm function<br>3.A major medical disorder that substantially reduces the likelihood that a subject will be able to comply with all study procedures<br>4.Severe depression, defined as Geriatric Depression Scale Score >10<br>5.Significant cognitive impairment, defined as Montreal Cognitive Assessment score < 22<br>6.Deficits in communication that interfere with reasonable study participation<br>7.A new symptomatic stroke has occurred since |                        |               |          |                   |                            |                          |

| Study author &<br>year (country) | Objectives | design | Participants'<br>number (age) | Gender | Stage of<br>stroke | Intervention | Setting of<br>treatment | Inclusion criteria | Exclusion criteria                                                                                                                                                                                                                                                                                                                                                                                                                                                                                                                       | Mode of<br>delivery of<br>VR | Target<br>region | Outcomes | Underlying<br>theory | Methods of<br>data<br>collection | Methods<br>of data<br>analysis |
|----------------------------------|------------|--------|-------------------------------|--------|--------------------|--------------|-------------------------|--------------------|------------------------------------------------------------------------------------------------------------------------------------------------------------------------------------------------------------------------------------------------------------------------------------------------------------------------------------------------------------------------------------------------------------------------------------------------------------------------------------------------------------------------------------------|------------------------------|------------------|----------|----------------------|----------------------------------|--------------------------------|
|                                  |            |        |                               |        |                    |              |                         |                    | the index stroke that occurred 4–36 weeks prior to randomization<br><br>8.Lacking visual acuity, with or without corrective lens, of 20/40 or better in at least one eye<br><br>9.Life expectancy < 6 months<br><br>10.Pregnant<br><br>11.Receipt of Botox to arms, legs, or trunk in the preceding 6 months, or expectation that Botox will be administered to the arm, leg, or trunk prior to completion of the 30 Day Follow-Up Visit<br><br>12.Unable to successfully perform all three of the rehabilitation exercise test examples |                              |                  |          |                      |                                  |                                |

| Study author &<br>year (country) | Objectives | design | Participants'<br>number (age) | Gender | Stage of<br>stroke | Intervention | Setting of<br>treatment | Inclusion criteria | Exclusion criteria                                                                                                                                                                                                                                                                                                                                                                                                                                                               | Mode of<br>delivery of<br>VR | Target<br>region | Outcomes | Underlying<br>theory | Methods of<br>data<br>collection | Methods<br>of data<br>analysis |
|----------------------------------|------------|--------|-------------------------------|--------|--------------------|--------------|-------------------------|--------------------|----------------------------------------------------------------------------------------------------------------------------------------------------------------------------------------------------------------------------------------------------------------------------------------------------------------------------------------------------------------------------------------------------------------------------------------------------------------------------------|------------------------------|------------------|----------|----------------------|----------------------------------|--------------------------------|
|                                  |            |        |                               |        |                    |              |                         |                    | 13.Unable or unwilling to perform study procedures/therapy, or expectation of noncompliance with study procedures/therapy<br>14.Concurrent enrollment in another investigational study<br>15.Non-English speaking, such that subject does not speak sufficient English to comply with study procedures<br>16.Expectation that subject cannot participate in study visits<br>17.Expectation that subject will not have a single domicile address during the six weeks of therapy, |                              |                  |          |                      |                                  |                                |

| Study author &<br>year (country) | Objectives | design | Participants’<br>number (age) | Gender | Stage of<br>stroke | Intervention | Setting of<br>treatment | Inclusion criteria | Exclusion criteria                                                                                  | Mode of<br>delivery of<br>VR | Target<br>region | Outcomes | Underlying<br>theory | Methods of<br>data<br>collection | Methods<br>of data<br>analysis |
|----------------------------------|------------|--------|-------------------------------|--------|--------------------|--------------|-------------------------|--------------------|-----------------------------------------------------------------------------------------------------|------------------------------|------------------|----------|----------------------|----------------------------------|--------------------------------|
|                                  |            |        |                               |        |                    |              |                         |                    | within 25 miles of the<br><br>central study site and<br><br>with Verizon wireless<br><br>reception. |                              |                  |          |                      |                                  |                                |

References:

67.

Pollock, A., et al., *Interventions for improving upper limb function after stroke*. Cochrane Database Syst Rev, 2014. **2014**(11): p. Cd010820.

68.

Frenkel-Toledo, S., et al., *Stroke Lesion Impact on Lower Limb Function*. Front Hum Neurosci, 2021. **15**: p. 592975.

69.

Pollock, A.S., et al., *What is balance?* Clin Rehabil, 2000. **14**(4): p. 402-6.

70.

Suchomel, T.J., et al., *The Importance of Muscular Strength: Training Considerations*. Sports Med, 2018. **48**(4): p. 765-785.

71.

Barbosa, H., et al., *Human mobility: Models and applications*. Physics Reports, 2018. **734**: p. 1-74.

72.

Montero-Odasso, M., et al., *World guidelines for falls prevention and management for older adults: a global initiative*. Age and Ageing, 2022. **51**(9).

73.

Mirelman, A., et al., *Gait*. Handb Clin Neurol, 2018. **159**: p. 119-134.

74.

Oben, P., *Understanding the Patient Experience: A Conceptual Framework*. Journal of Patient Experience, 2020. **7**(6): p. 906-910.
